# Supplementary material for: Experiment design and bacterial abundance control extracellular H 2 O 2 concentrations during four series of mesocosm experiments
Source: Copernicus journal article supplement (doi:10.5194/bg-17-1309-2020), 2020-03-16
Supplement: Supplementary file 1 [file bg-17-1309-2020-supplement.pdf]

Supplement of Biogeosciences, 17, 1309–1326, 2020  
<https://doi.org/10.5194/bg-17-1309-2020-supplement>  
© Author(s) 2020. This work is distributed under  
the Creative Commons Attribution 4.0 License.

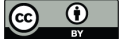

*Supplement of*

## **Experiment design and bacterial abundance control extracellular H<sub>2</sub>O<sub>2</sub> concentrations during four series of mesocosm experiments**

**Mark J. Hopwood et al.**

*Correspondence to:* Mark J. Hopwood (mhopwood@geomar.de)

The copyright of individual parts of the supplement might differ from the CC BY 4.0 License.

## Supplementary Material

### Mesocosm/multistressor/microcosm experiment designs.

*C*, Carbon, denotes an addition of dissolved organic carbon (glucose) relative to  $PO_4$  according to the Redfield ratio.

*HG/LG*, high grazing/low grazing, denotes where zooplankton were added

*LpH*, low pH, denotes where pH were lowered by acid addition

### I Ocean Certain mesocosm design.

| DOC          | 0     | 0.5     | 1     | 2     | 3     |
|--------------|-------|---------|-------|-------|-------|
| Low Grazing  | LG 0C | LG 0.5C | LG 1C | LG 2C | LG 3C |
| High Grazing | HG 0C | HG 0.5C | HG 1C | HG 2C | HG 3C |

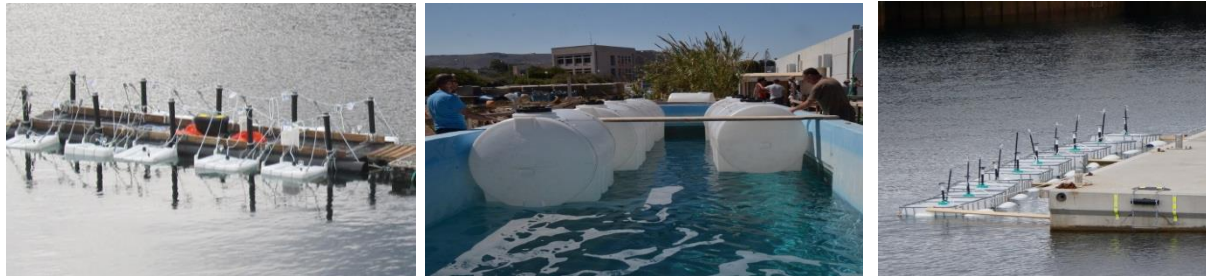

Large HDPE containers were incubated at ambient seawater temperatures tethered to jetties or, (for MesoMed) within a pool facility continuously flushed with seawater. *Left MesoArc, centre MesoMed, right MesoArc.*

### II Ocean Certain multistressor design

| DOC       |              | 0         | 0.5         | 1         | 2         |
|-----------|--------------|-----------|-------------|-----------|-----------|
| Normal pH | Low Grazing  | LG 0C     | LG 0.5C     | LG 1C     | LG 2C     |
|           | High Grazing | HG 0C     | HG 0.5C     | HG 1C     | HG 2C     |
| Low pH    | Low Grazing  | LG 0C LpH | LG 0.5C LpH | LG 1C LpH | LG 2C LpH |
|           | High Grazing | HG 0C LpH | HG 0.5C LpH | HG 1C LpH | HG 2C LpH |

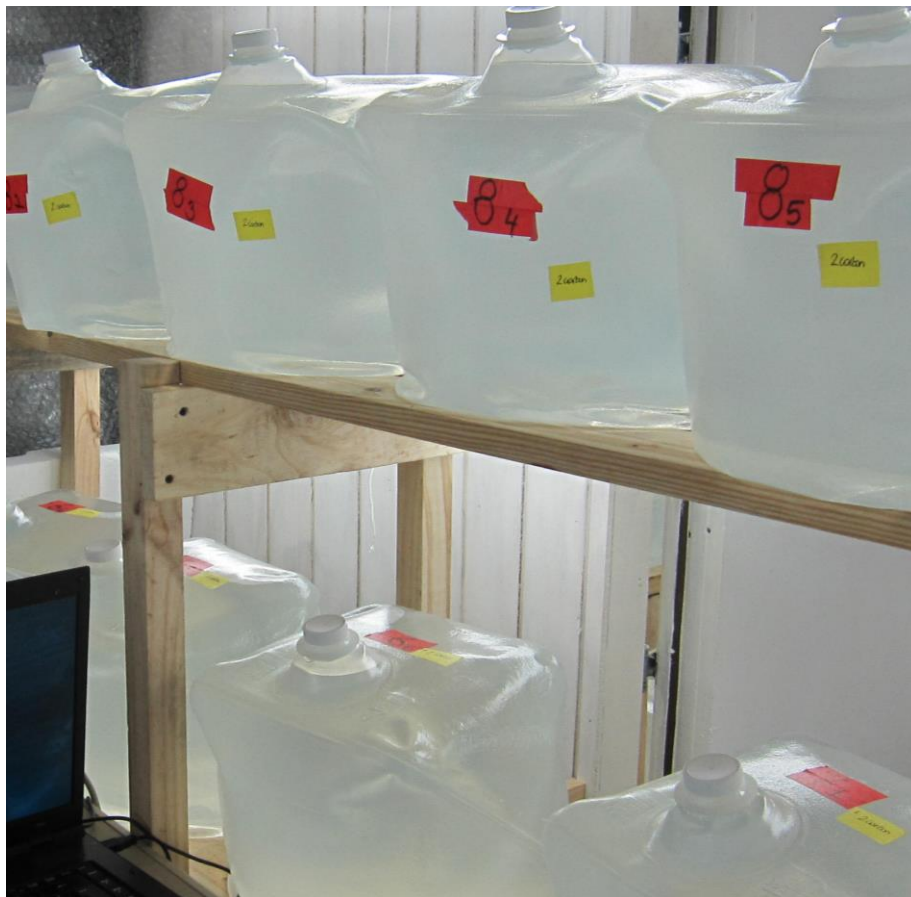

20 L containers for the multistressor experiment (one container per sampling day) were incubated on custom made racks designed to ensure equal distribution of light and to facilitate easy access to the containers for mixing/sampling (*Patagonia multistressor room shown*).

### III Ocean Certain microcosm (MesoPat only)

The experiment matrix of I was used but with the 20 L collapsible container setup of II rather than the large 1000 L containers used for I.

### IV Gran Canaria pCO<sub>2</sub> mesocosm

|                            |     |      |     |      |     |      |     |      |
|----------------------------|-----|------|-----|------|-----|------|-----|------|
| pCO <sub>2</sub> /<br>µatm | 550 | 1300 | 850 | 1000 | 400 | 1450 | 700 | 1150 |
| Mesocosm                   | 1   | 2    | 3   | 4    | 5   | 6    | 7   | 8    |

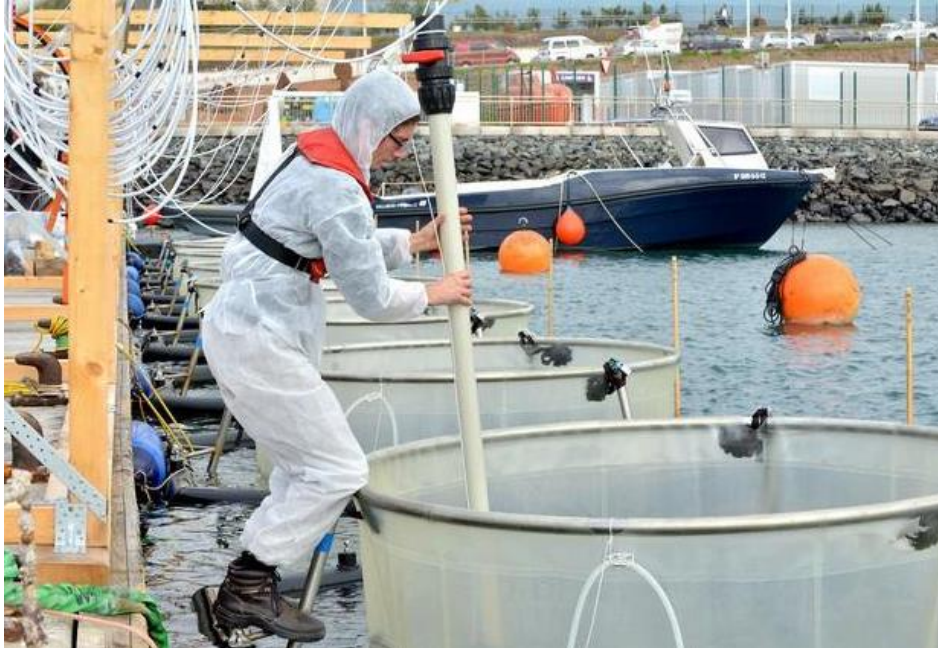

Polyurethane bags, supported by steel framework, were tethered to a jetty in Taliarte. During sampling the mesocosms were pulled adjacent to the jetty (*as shown*), otherwise the mesocosms were free to float 2-3 m away from the jetty.

**Figure S1: Experimental design for all mesocosm, microcosm and multi-stressor incubation experiments. Mesocosm experimental matrix (I) for MesoPat/MesoArc/MesoMed (II) The multistressor experiments, conducted at the same fieldsites as the MesoPat/MesoArc/MesoMed mesocosms mimicked I but with the addition of a low pH treatment (with a pH 0.4-0.6 lower than the unmodified treatment). (III) The Patagonia microcosm experiment used the matrix of I but with the 20 L scale experiment setup of II. (IV) The Gran Canaria mesocosm used a pCO<sub>2</sub> gradient.**
